# Supplementary material
Source: publisher site journal article supplement (https://www.dovepress.com/article/346596)
Supplement: Supplementary file 1 [file get_supplementary_file.php]

**Table S1.** Basic chemical and biological information of CPD 23

| **Contents** | **CPD 23a** |
| --- | --- |
| **Name** | 2-(5-Methoxy-1-methyl-1H-indol-3-yl)-N-(5-(4-(6-(2-(3-(trifluoromethoxy)phenyl)acetamido)pyridazin-3-yl)butyl)-1,3,4-selenadiazol-2-yl)acetamide |
| **Molecular weight** | 701.15 |
| **Appearance** | Reddish brown powder, loose texture |
| **Solubility (25 ± 2 ℃)** | 0.31 μg/mL (water)  50 mg/mL (DMSO) |
| **CLogP b** | 4.58 (ALOGPS2.1)  4.77 (ChemBioDraw14.0) |
| **Enzymatic activity (IC50)** | 0.01 μM (kidney-type glutaminase)  ＞13 μM (glutaminase dehydrogenase) |
| **Cell inhibition (IC50)** | 4.05 μM (H22 cells)  0.01 μM (A549 cells)  0.02 μM (HCT116 cells)  0.02 μM (Caki-1 cells) |
| **Xenograft mice model inhibition** | 37% (10 mg/kg, SC) |

**Notes:** a: data of enzymatic activity, cell inhibition and xenograft mice model inhibition were cited from the previous work (reference: Chen Z, Li D, Xu N, et al. Novel 1,3,4-Selenadiazole-containing kidney-type glutaminase inhibitors showed improved cellular uptake and antitumor activity. *J Med Chem*. 2019;62(2):589-603.); b: CLogP:calculated LogP, which was assessed by ALOGPS2.1 (<http://www.vcclab.org/lab/alogps/>) and ChemBioDraw14.0.

**Table S2.** The tumor cell growth Inhibition by free CPD 23, CPD 23@SOL micelles and blank SOL micelles

| **Tested samples** | **H22 (IC50:** μM**)** | **A549 (IC50:** μM**)** |
| --- | --- | --- |
| **Free CPD 23** | 2.94 ± 0.04 | 0.008 ± 0.001 |
| **CPD 23@SOL micelles** | 1.83 ± 0.02 | 0.042 ± 0.06 |
| **Blank SOL micelles** | ＞ 30 | ＞ 30 |

**Note:** Data were presented as Mean ± SD, n=3.

**Abbreviations:** H22: mouse hepatoma cells; A549: human non-small cell lung cancer cells.


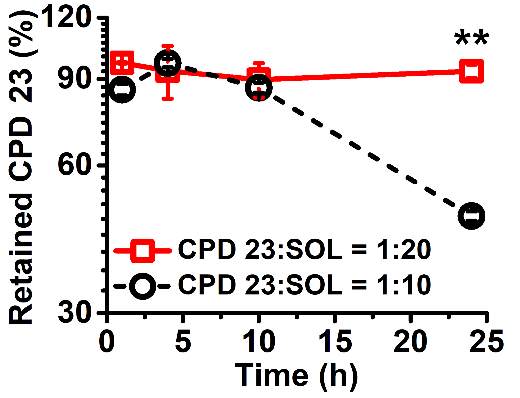


**Figure S1.** The leakage of CPD 23@SOL micelles at CPD 23:SOL mass ratios 1:10 and 1:20 (37 ± 2 ℃) at 37 ℃.

**Notes:** **, P＜0.01; Data were presented as Mean ± SD, n=3.

**Abbreviations:** SOL: Soluplus®.


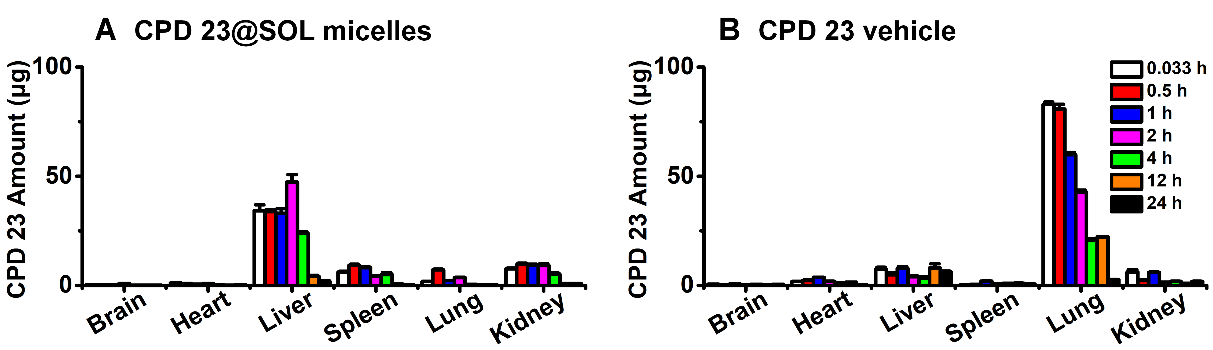


**Figure S2.** The biodistributions of CPD 23@SOL micelles and CPD 23 vehicle in tissues via intravenous administration at the dose of 20 mg/kg (CPD 23).

**Notes:** By IV administration, the total amounts of CPD 23 distributed in brain, heart, liver, spleen, lung and kidney in CPD 23@SOL micelles group (A) and CPD 23 vehicle group (B) were quantified within 24 h. Data were presented as Mean ± SD, n=3.

**Abbreviations:** IV: intravenous; WCPD 23: the weight of CPD 23 in tissue; Wtissue: the weight of tissue.
